# Supplementary material
Source: Springer Nature journal article supplement (https://www.springermedizin.de/resource/supplementary/12899_2011_183_MOESM5_ESM.pdf/9514626)

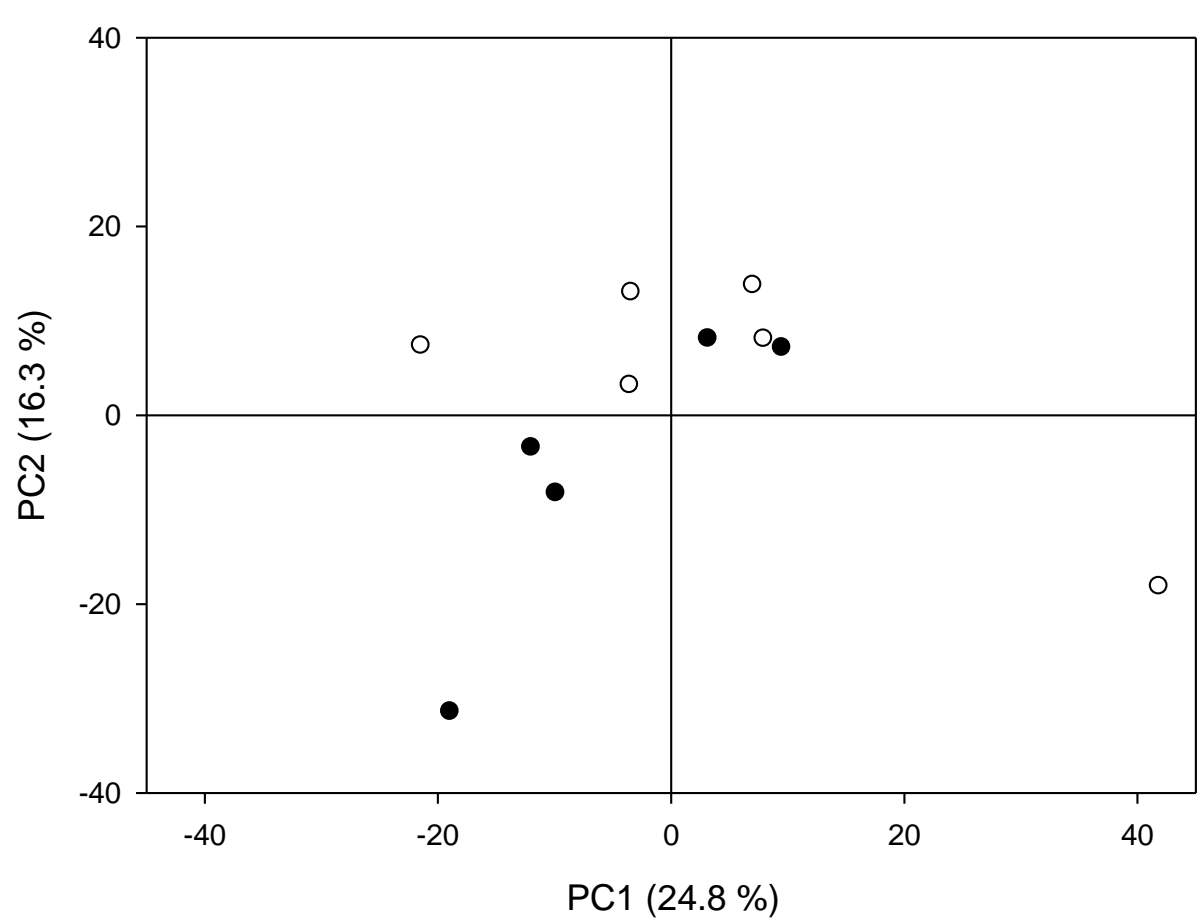

Supplement: MOESM5 [file 9514626]
